# Supplementary figures and images for: 16S rRNA Gene Sequencing Revealed Changes in Gut Microbiota Composition during Pregnancy and Lactation in Mice Model
Source: MDPI journal article supplement (doi:10.3390/vetsci9040169), 2022-04-01

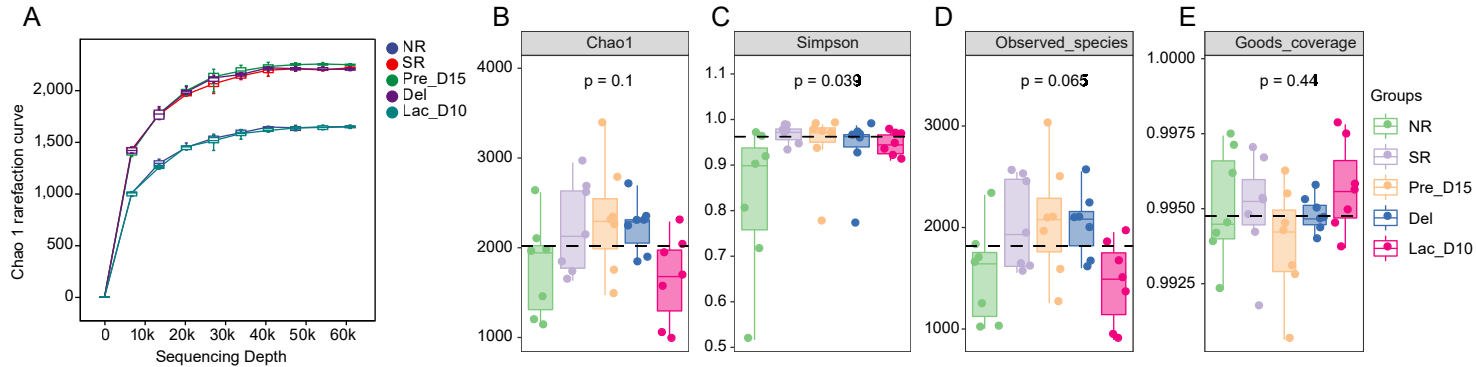

Supplement: s1 [file s1]

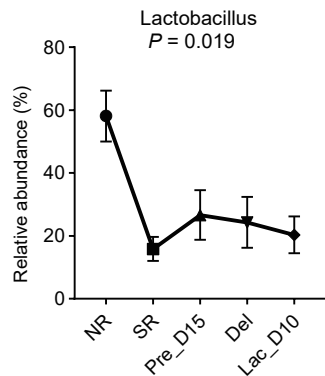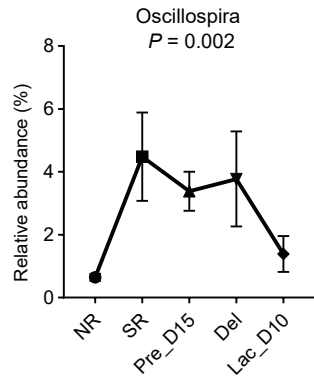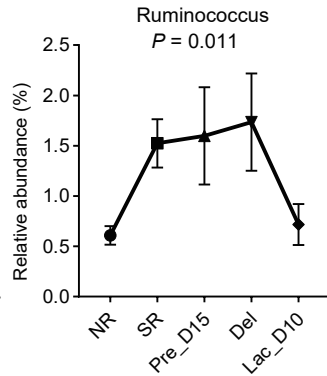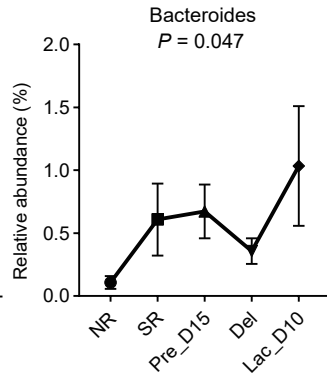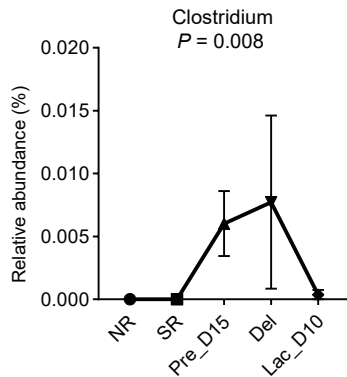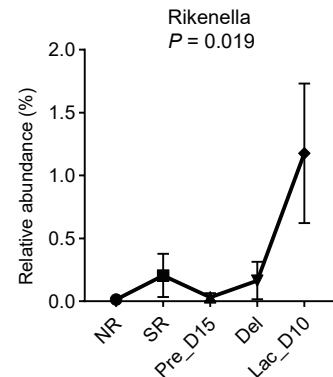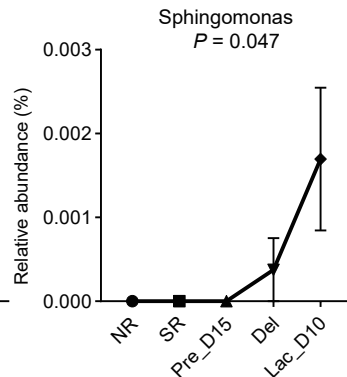

Supplement: s1 [file s1]
